# Supplementary material
Source: HighWire-hosted journal article supplement (https://www.annfammed.org/highwire/filestream/8897/field_highwire_adjunct_files/0/Shelley_Supp_Apps.pdf)
Supplement: Shelley_Supp_Apps.pdf [file Shelley_Supp_Apps.pdf]

**Supplemental materials for:**

Shelley D, Blechter B, Siman N, et al. Quality of cardiovascular disease care in small urban practices. *Ann Fam Med*. 2018;16(Suppl 1):21-28.

## Appendix 1. Measures of independent variables

| Variable (data source)                                     | Survey item                                                                                                                                                                                                                                                                                                                                                                                                                                                                                                                                                 | Coding method                                                                              |
|------------------------------------------------------------|-------------------------------------------------------------------------------------------------------------------------------------------------------------------------------------------------------------------------------------------------------------------------------------------------------------------------------------------------------------------------------------------------------------------------------------------------------------------------------------------------------------------------------------------------------------|--------------------------------------------------------------------------------------------|
| <b>Practice characteristics</b>                            |                                                                                                                                                                                                                                                                                                                                                                                                                                                                                                                                                             |                                                                                            |
| Number of clinicians (Practice Survey)                     | Which of the following best describes your practice site size?<br>A. Solo practice<br>B. 2-5 clinicians (MD, DO, NP, PA)<br>C. 6-10 clinicians<br>D. 11-15 clinicians<br>E. 16 or more clinicians                                                                                                                                                                                                                                                                                                                                                           | 1 = “Solo clinician” (Answer option A)<br>0 = “≥2 clinicians” (Other than answer option A) |
| Full-time equivalent of supporting staff (Practice Survey) | Please provide the combined FTE for each of the following type of staff.<br>A. Clinical Staff (those providing direct patient care, e.g., RN, LPN, MA, CMA)<br>B. Office staff (those supporting practice operations and NOT involved directly in patient care, e.g., receptionists, billing staff, data analyst, etc.)<br>C. Psychologist<br>D. Social worker or Licensed Social Worker<br>E. PharmD or Pharmacist<br>F. Other                                                                                                                             | Total FTE equals to the sum of FTE in all the categories A-F                               |
| Practice ownership (Practice Survey)                       | Which of the following best describes your practice site size?<br>A. Clinician-owned solo or group practice<br>B. Hospital/Health system owned<br>C. Health maintenance organization (e.g., Kaiser Permanente)<br>D. Federally Qualified Health Center or Look-Alike<br>E. Non-federal government clinic (e.g., state, county, city, public health clinic, etc.)<br>F. Academic health center / faculty practice<br>G. Federal (Military, Veterans Administration, Department of Defense)<br>H. Rural Health Clinic<br>I. Indian Health Service<br>J. Other | 1 = “Independent” (Answer option A)<br>0 = “Non-independent” (Answer options B-J)          |
| ACO status (Practice Survey)                               | Is your practice site part of an accountable care organization (ACO)? (Check all that apply.)<br>A. Yes, Medicaid ACO<br>B. Yes, Medicare ACO (Pioneer, Shared Savings Plan, or Advance Payment)<br>C. Yes, Private/Commercial ACO<br>D. Yes, Another type of ACO<br>E. No, not part of an ACO<br>F. Don’t know                                                                                                                                                                                                                                             | 1 = “Part of ACO” (Answer options A-D)<br>0 = “Other” (Answer options E and F)             |
| MUA designation (HRSA Website)                             | Has your practice site been designated as a medically underserved area (MUA) or medically underserved population (MUP) by the Health Resources and Service Administration (HRSA)?<br>A. Yes      B. No                                                                                                                                                                                                                                                                                                                                                      | 1 = “Yes”<br>0 = “No”                                                                      |

|                           |                                                                                                               |                       |
|---------------------------|---------------------------------------------------------------------------------------------------------------|-----------------------|
| PCMH recognition (PCIP)   | Is your practice site recognized or accredited as a patient-centered medical home (PCMH)<br>A. Yes      B. No | 1 = “Yes”<br>0 = “No” |
| Patient panel size (PCIP) | Please estimate the average patient panel size for a full-time clinician in your practice site                |                       |

---

### Patient characteristics

|                                        |                                                                                                                                                                                                                                                                             |                                                                                        |
|----------------------------------------|-----------------------------------------------------------------------------------------------------------------------------------------------------------------------------------------------------------------------------------------------------------------------------|----------------------------------------------------------------------------------------|
| % of non-Hispanic white patient (PCIP) | Please give the percentage of your patients in the following categories.<br>A. White<br>B. Black/African American<br>C. American Indian or Alaska Native<br>D. Asian<br>E. Native Hawaiian or Other Pacific Islander<br>F. Some Other Race/Mixed Race<br>G. Percent Unknown |                                                                                        |
| % of Medicaid payer (Practice Survey)  | Please give the approximate percentage of your patients in the following payer categories.<br>A. Medicare only<br>B. Medicaid only<br>C. Dual Medicare and Medicaid<br>D. Private or commercial<br>E. No insurance<br>F. Other                                              | Total percent of patients on Medicaid was calculated by summing answer options B and C |

---

### Organizational capacity

|                                           |                                                                                                                                                                                                                                                                                                                                                                                                                                                                                                                                                                                                                                                                                                                                                                                                                                                                                                                                                                                                                                                                                                                                                                                                                                          |                                                                                                                                                                                                                                                                                     |
|-------------------------------------------|------------------------------------------------------------------------------------------------------------------------------------------------------------------------------------------------------------------------------------------------------------------------------------------------------------------------------------------------------------------------------------------------------------------------------------------------------------------------------------------------------------------------------------------------------------------------------------------------------------------------------------------------------------------------------------------------------------------------------------------------------------------------------------------------------------------------------------------------------------------------------------------------------------------------------------------------------------------------------------------------------------------------------------------------------------------------------------------------------------------------------------------------------------------------------------------------------------------------------------------|-------------------------------------------------------------------------------------------------------------------------------------------------------------------------------------------------------------------------------------------------------------------------------------|
| Adaptive reserve (Practice Member Survey) | <ol style="list-style-type: none"> <li>1. Mistakes have led to positive changes here</li> <li>2. I have many opportunities to grow in my work</li> <li>3. People in our practice actively seek new ways to improve how we do things</li> <li>4. People at all levels in this office openly talk about what is and isn't working</li> <li>5. Leadership strongly supports practice change efforts</li> <li>6. After trying something new, we take time to think about how it worked</li> <li>7. Most of the people who work in our practice seem to enjoy their work</li> <li>8. It is hard to get things to change in our practice</li> <li>9. This practice is a place of joy and hope</li> <li>10. This practice learns from its mistakes</li> <li>11. Practice leadership promotes an environment that is an enjoyable place to work</li> <li>12. People in this practice operate as a real team</li> <li>13. When we experience a problem in the practice, we make a serious effort to figure out what's really going on</li> <li>14. Leadership in this practice creates an environment where things can be accomplished</li> </ol> <p><i>Each item is offered a 5-point Likert scale as below.</i></p> <p>A. Strongly disagree</p> | Each item was scored on a 1 (“Strongly disagree”) to 5 (“Strongly agree”) scale. To obtain the mean adaptive reserve score, we converted the score for each item to a 0-1 scale and then summed up all the non-missing values and divided by the total number of non-missing items. |
|-------------------------------------------|------------------------------------------------------------------------------------------------------------------------------------------------------------------------------------------------------------------------------------------------------------------------------------------------------------------------------------------------------------------------------------------------------------------------------------------------------------------------------------------------------------------------------------------------------------------------------------------------------------------------------------------------------------------------------------------------------------------------------------------------------------------------------------------------------------------------------------------------------------------------------------------------------------------------------------------------------------------------------------------------------------------------------------------------------------------------------------------------------------------------------------------------------------------------------------------------------------------------------------------|-------------------------------------------------------------------------------------------------------------------------------------------------------------------------------------------------------------------------------------------------------------------------------------|

|                        |                                                                                                                                                                                                                                                                                                                                                                                                                                                                                                                                                                                                                                                                                                                                                                                                                                                                                                                                                                                                                                                                                                                                                                                                                                                                                                                                                                                                                                                                                                                                                                                                                                                                                                                                                                                                                                                                                                                                                                                                                                                                                                           |                                                                                                                                                                                                                                                                                 |
|------------------------|-----------------------------------------------------------------------------------------------------------------------------------------------------------------------------------------------------------------------------------------------------------------------------------------------------------------------------------------------------------------------------------------------------------------------------------------------------------------------------------------------------------------------------------------------------------------------------------------------------------------------------------------------------------------------------------------------------------------------------------------------------------------------------------------------------------------------------------------------------------------------------------------------------------------------------------------------------------------------------------------------------------------------------------------------------------------------------------------------------------------------------------------------------------------------------------------------------------------------------------------------------------------------------------------------------------------------------------------------------------------------------------------------------------------------------------------------------------------------------------------------------------------------------------------------------------------------------------------------------------------------------------------------------------------------------------------------------------------------------------------------------------------------------------------------------------------------------------------------------------------------------------------------------------------------------------------------------------------------------------------------------------------------------------------------------------------------------------------------------------|---------------------------------------------------------------------------------------------------------------------------------------------------------------------------------------------------------------------------------------------------------------------------------|
|                        | <p>B. Disagree</p> <p>C. Neutral</p> <p>D. Agree</p> <p>E. Strongly agree</p>                                                                                                                                                                                                                                                                                                                                                                                                                                                                                                                                                                                                                                                                                                                                                                                                                                                                                                                                                                                                                                                                                                                                                                                                                                                                                                                                                                                                                                                                                                                                                                                                                                                                                                                                                                                                                                                                                                                                                                                                                             |                                                                                                                                                                                                                                                                                 |
| CPCQ (Practice Survey) | <p>Indicate the extent to which you agree or disagree that your practice site has used the following strategies to improve cardiovascular preventive care:</p> <ol style="list-style-type: none"> <li>1. Providing information and skills-training</li> <li>2. Using opinion leaders, role modeling. Or other vehicles to encourage support for change</li> <li>3. Changing or creating systems in the practice that make it easier to provide high quality care</li> <li>4. Removal or reduction of barriers to better quality of care</li> <li>5. Using teams focused on accomplishing the change process for improved care</li> <li>6. Delegating to non-clinician staff the responsibility to carry out aspects of care that are normally the responsibility of physicians</li> <li>7. Providing to those who are charged with implementing improved care the power to authorize and make the desired changes</li> <li>8. Periodic measurements of care quality for assessing compliance with any new approach to care</li> <li>9. Reporting measurements of practice performance on cardiovascular disease prevention measures (such as aspirin for patients at risk for ischemic vascular disease) for comparison with their peers</li> <li>10. Setting goals and benchmarking rates of performance quality on cardiovascular disease prevention measures at least yearly</li> <li>11. Customizing the implementation of cardiovascular disease prevention care changes to the practice</li> <li>12. Using rapid cycling, piloting, pre-testing, or other vehicles for reducing the risk of negative results for introducing organization-wide change in care</li> <li>13. Deliberately designing care improvements so as to make clinician participation less work than before</li> <li>14. Deliberately designing care improvements to make the care process more beneficial to the patient</li> </ol> <p><i>Each item is offered a 5-point Likert scale as below.</i></p> <p>A. Strongly disagree</p> <p>B. Disagree</p> <p>C. Neutral</p> <p>D. Agree</p> <p>E. Strongly agree</p> <p>F. NA</p> | <p>Each item was scored on a 1 (“Strongly disagree”) to 5 (“Strongly agree”) scale. To obtain the mean CPCQ score, we converted the score for each item to a 0-1 scale, and then summed up all the non-missing values and divided by the total number of non-missing items.</p> |

---

|                                  |                                                                                                                                                                                                                                                                                                                                                                                                                                                                                                                                                                                                                                                                                                 |                                                                                          |
|----------------------------------|-------------------------------------------------------------------------------------------------------------------------------------------------------------------------------------------------------------------------------------------------------------------------------------------------------------------------------------------------------------------------------------------------------------------------------------------------------------------------------------------------------------------------------------------------------------------------------------------------------------------------------------------------------------------------------------------------|------------------------------------------------------------------------------------------|
| Burnout (Practice Member Survey) | Using your own definition of burnout - please indicate which of the following statements best describes how you feel about your situation at work<br>A. I enjoy my work. I have no symptoms of burnout<br>B. Occasionally I am under stress, and I don't always have as much energy as I once did, but I don't feel burned out<br>C. I am definitely burning out and have one or more symptoms of burnout, such as physical and emotional exhaustion<br>D. The symptoms of burnout that I'm experiencing won't go away. I think about frustrations at work a lot<br>E. I feel completely burned out and often wonder if I can go on practicing. I am at the point where I may need some changes | 1 = "Burnout"<br>(Answer options C-E)<br>0 = "Not burned out"<br>(Answer options A or B) |
|----------------------------------|-------------------------------------------------------------------------------------------------------------------------------------------------------------------------------------------------------------------------------------------------------------------------------------------------------------------------------------------------------------------------------------------------------------------------------------------------------------------------------------------------------------------------------------------------------------------------------------------------------------------------------------------------------------------------------------------------|------------------------------------------------------------------------------------------|

---

APPENDIX 2. Algorithm of calculating the proportion of patients who meet the treatment target of the ABCS clinic guidelines

| Outcome                | Proportion of patients who meet the treatment target of the clinic guideline                                                                                                                                                                                                                                                                  |
|------------------------|-----------------------------------------------------------------------------------------------------------------------------------------------------------------------------------------------------------------------------------------------------------------------------------------------------------------------------------------------|
| Aspirin                | $\frac{\text{Patients aged } \geq 18 \text{ years with ASCVD who were treated with aspirin or other antithrombotic}}{\text{Patients aged } \geq 18 \text{ years with diagnosis of ASCVD}} \times 100\%$                                                                                                                                       |
| Blood pressure control | $\frac{\text{Patients aged 18 – 85 whose blood pressure was adequately controlled (< 140/90)}}{\text{Patients aged 18 – 85 with diagnosis of hypertension}} \times 100\%$                                                                                                                                                                     |
| Cholesterol management | $\frac{\text{Patients who are on statin therapy}}{\text{Patients aged } \geq 21 \text{ years and diagnosis of ASCVD or with a history of LDL } \geq 190\text{mg/dL, or adults aged 40 – 75 with diabetes and LDL 70 – 189mg/dL}} \times 100\%$                                                                                                |
| Smoking                | $\frac{\text{Patients aged } \geq 18 \text{ who were screened for tobacco use AND who received cessation intervention or counseling if identified as a tobacco user}}{\text{Patients aged } \geq 18 \text{ with 2 or more visits during the measurement period or one or more preventive visits during the measurement period}} \times 100\%$ |
| Composite measure      | $\frac{\text{Patient aged 21 – 85 who are on aspirin and statin therapy and blood pressure controlled to < 140/90}}{\text{Patients aged 21 – 85 with diagnosis of AASCVD}} \times 100\%$                                                                                                                                                      |
